# Supplementary material for: Impact of mature tertiary lymphoid structures on prognosis and therapeutic response of Epstein-Barr virus-associated gastric cancer patients
Source: PubMed Central journal article supplement (PMC9794571; doi:10.3389/fimmu.2022.973085), 2022-12-14
Supplement: DataSheet_1.pdf [file DataSheet_1.pdf]

## Supplemental data

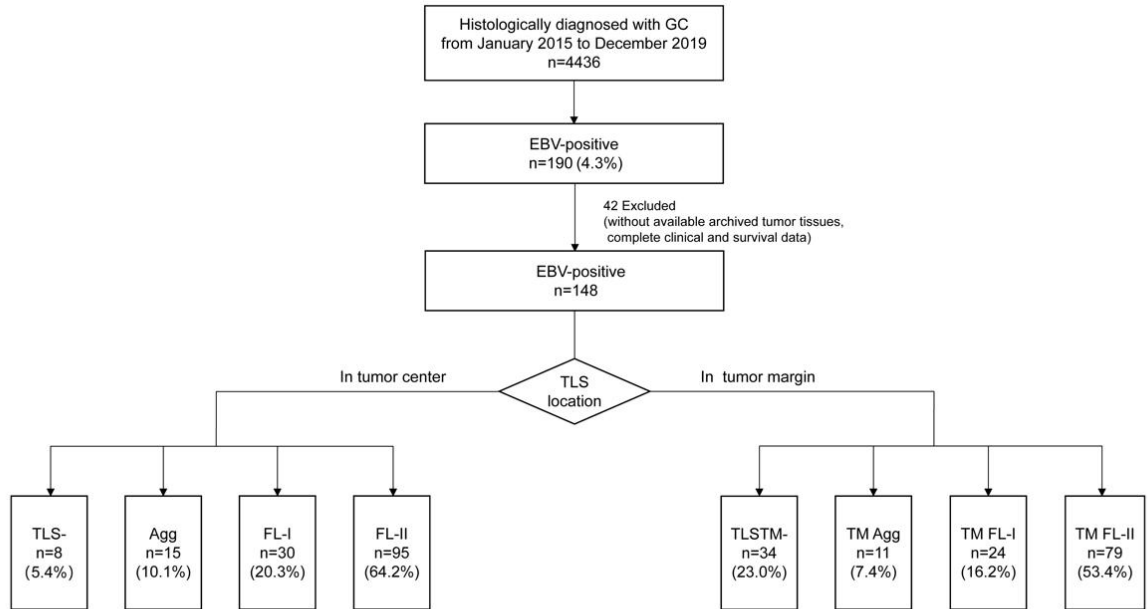

**Figure S1. Study flow chart in the SYSUCC cohort.** EBV-positive patients meeting the criteria were selected from the continuous GC cohort and TLSs were assessed according to location and maturation. EBV, Epstein-Barr virus; GC, gastric cancer; TLSs, tertiary lymphoid structures; TLS-, without any TLSs in tumor center; TLSTM-, without any TLSs in tumor margin; Agg, aggregates in tumor center; TM Agg, aggregates in tumor margin; FL-I, primary follicles; FL-II, secondary follicles.

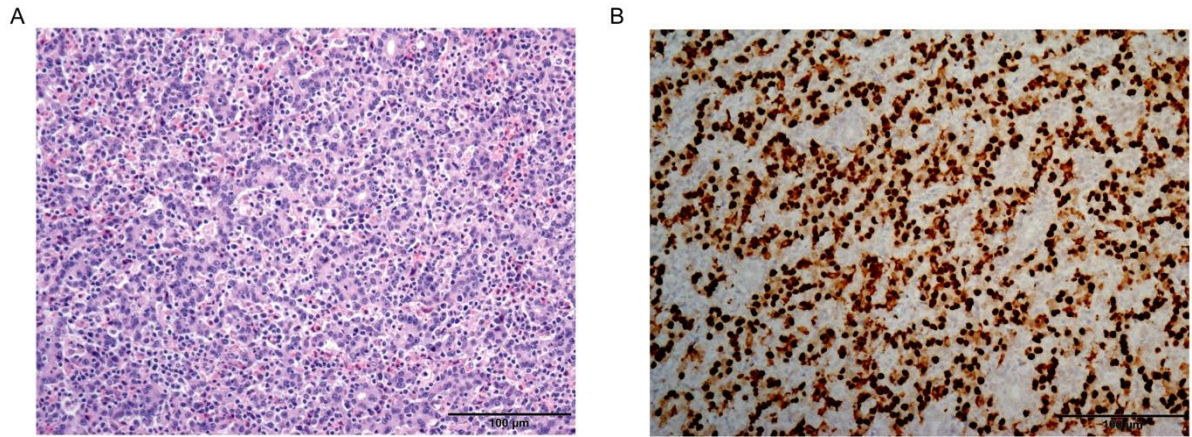

**Figure S2. Examples of EBER staining morphology in EBVaGC patients. (A)** Hematoxylin and eosin (H&E) slide in EBVaGC tissues; (B) The corresponding images of EBER detection. EBER-ISH, EBV-encoded RNA in situ hybridization; EBVaGC, Epstein-Barr virus associated gastric cancer.

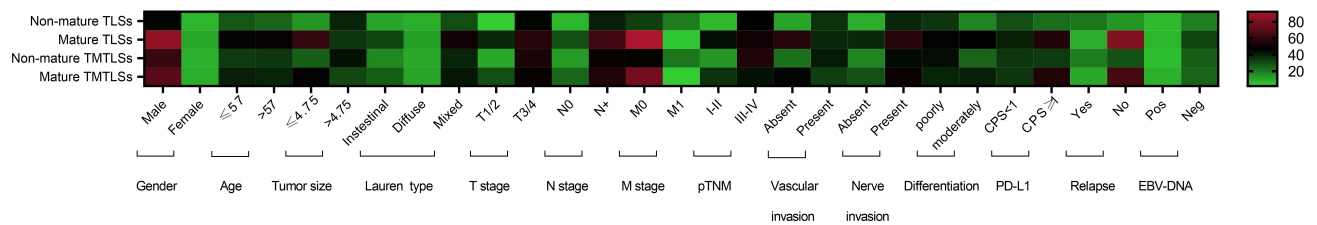

**Figure S3. Heat map to describe the clinicopathological characteristics of Epstein-Barr virus associated gastric cancer patients in the SYSUCC cohort.**

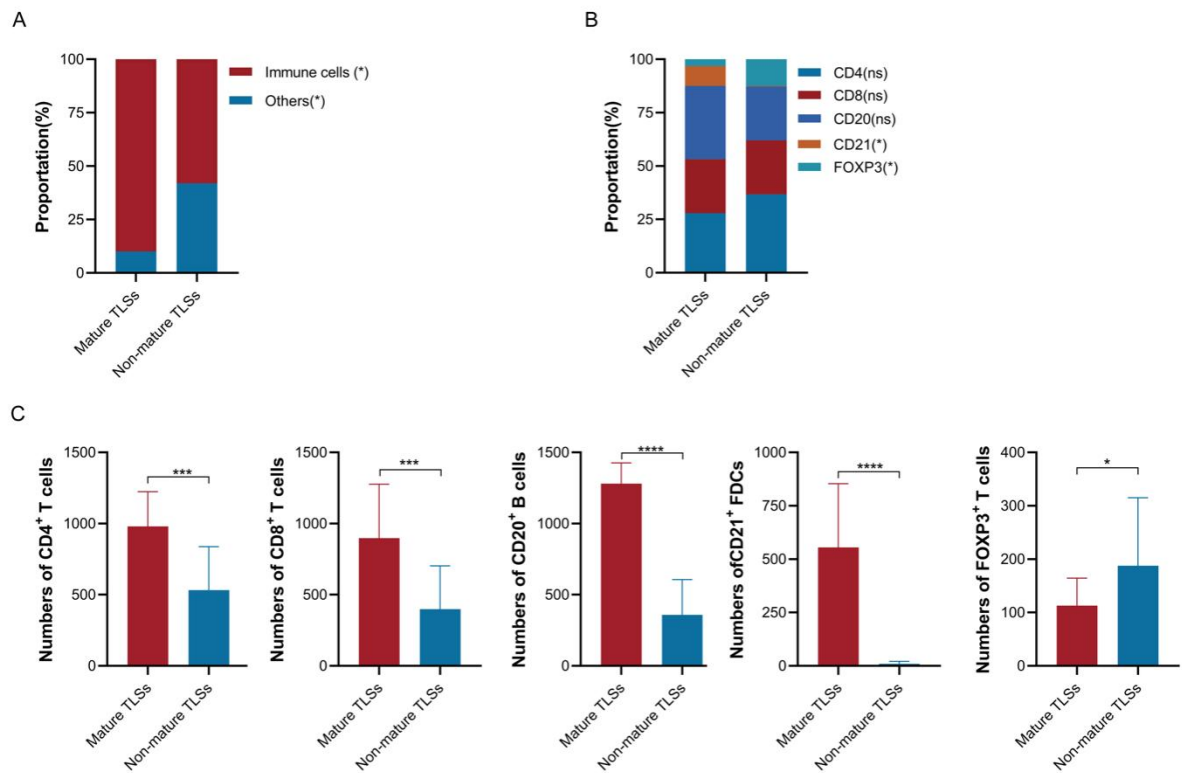

**Figure S4. Quantification of the infiltrating immune cells.** (A) The percentages of infiltrating immune cells in mature TLSs and non-mature TLSs. (B) The percentages of cells, describing the immune cell composition. (C) The number of infiltrating immune cells in mature TLSs or non-mature TLSs. Numbers of infiltrating immune cells were counted at fifteen random high-power fields of three slides. Magnification, x200.  $p < 0.05^*$ ,  $p < 0.01^{**}$ ,  $p < 0.001^{***}$  and  $p < 0.0001^{****}$ . TLSs, tertiary lymphoid structures; FDCs, Follicular dendritic cells.

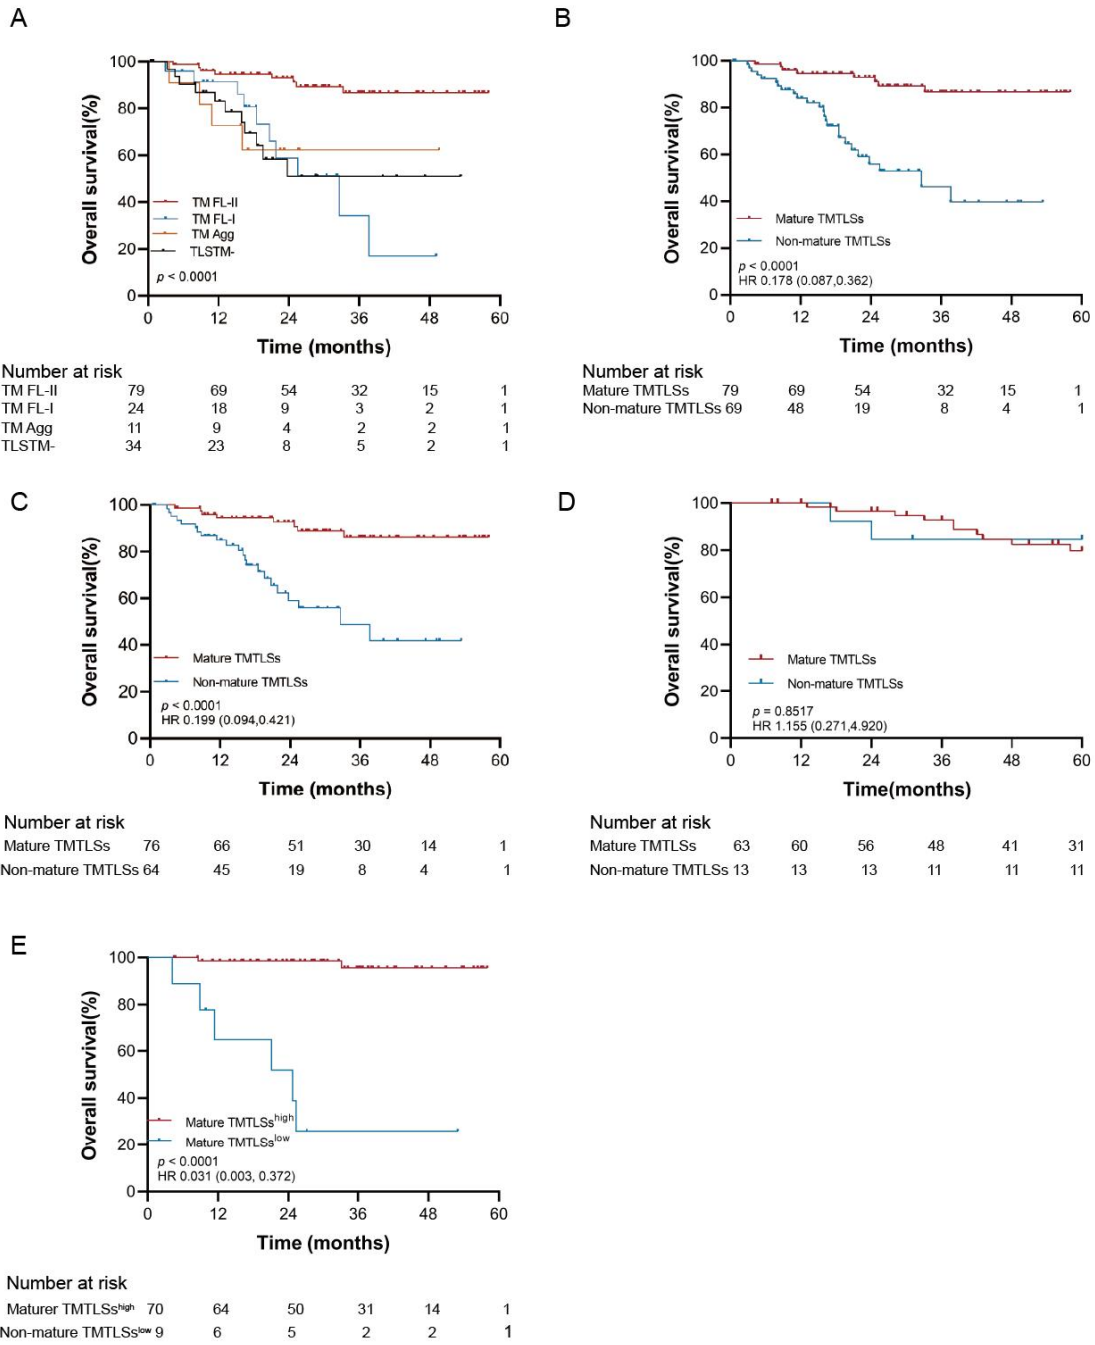

**Figure S5. Kaplan-Meier estimates of overall survival according to the maturation of peritumoral TLSs (log-rank test).** (A) Probability of survival of patients in TLSTM-, TM Agg, TM FL-I, and TM FL-II groups in the SYSUCC cohort. (B) Probability of survival of patients in mature TMTLSs and non-mature TMTLSs

groups in the SYSUCC cohort. (C) Probability of survival of patients in mature TMTLSs and non-mature TMTLSs groups in the SYSUCC cohort, except receiving neoadjuvant chemotherapy patients. (D) Probability of survival of patients in mature TMTLSs and non-mature TMTLSs groups in the validation cohort.

(E) Probability of survival of patients in mature TMTLSs<sup>high</sup> and mature TMTLSs<sup>low</sup> groups in the SYSUCC cohort. EBVaGC: Epstein-Barr virus associated gastric cancer; TLSs: tertiary lymphoid structures; TM Agg, aggregates in tumor margin; TM FL-I: primary follicles in tumor margin; TM FL-II: secondary follicles in tumor margin; Mature TMTLSs: known as FL-II in tumor margin; Non-mature TMTLSs: including TLSTM-, TM Agg, TM FL-I; Mature TMTLSs<sup>high</sup>: high density of mature TLSs in tumor margin; Mature TMTLSs<sup>low</sup>: low density of mature TLSs in tumor margin.

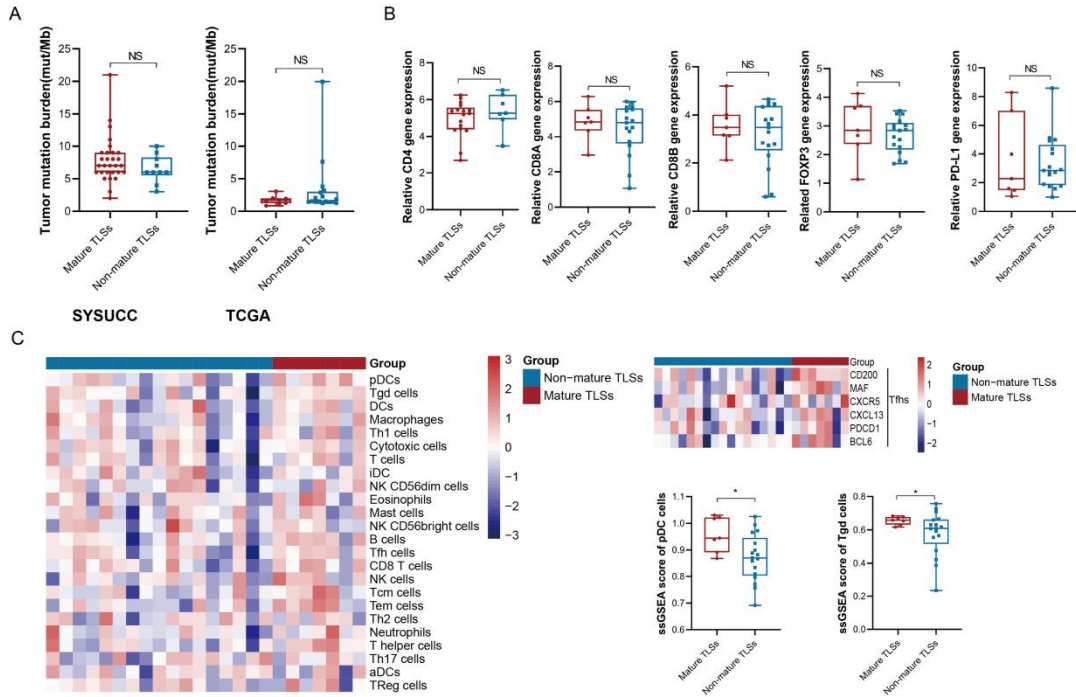

**Figure S6. Immune infiltration profile and TMB of EBVaGC patients.** (A) Tumor mutation burden in mature TLSs or non-mature TLSs between the SYSUCC and TCGA cohorts. (B) The expression level of some TLS markers and PD-L1 in mature TLSs or non-mature TLSs from the TCGA cohort. (C) The immune infiltration patterns in mature TLSs or non-mature TLSs from the TCGA cohorts.  $p < 0.05^*$ . SYSUCC, Sun Yat-sen University Center; Tfh: T follicular helper cells; pDC, plasmacytoid dendritic cells; Tgd cells, T gamma delta cells.

**Table S1. Correlation between the maturation of TLS and clinico-pathological features in EBV-positive gastric cancer  
in the the validation cohort**

| Characteristics     | Available number | Tumor center    |             |                             | Tumor margin      |               |                             |
|---------------------|------------------|-----------------|-------------|-----------------------------|-------------------|---------------|-----------------------------|
|                     |                  | Non-mature TLSs | Mature TLSs | <i>P</i> value <sup>a</sup> | Non-mature TMTLSs | Mature TMTLSs | <i>P</i> value <sup>a</sup> |
| Gender              | 76               |                 |             | 0.922                       |                   |               | 0.970                       |
| Male                | 67 (88.2%)       | 36 (53.7%)      | 31 (46.%)   |                             | 12 (17.9%)        | 55 (82.1%)    |                             |
| Female              | 9 (11.8%)        | 4 (44.4%)       | 5 (55.6%)   |                             | 1 (11.1%)         | 8 (88.9%)     |                             |
| Age (years)         | 76               |                 |             | 0.981                       |                   |               | 0.261                       |
| ≤ 57.0 <sup>b</sup> | 40 (52.6%)       | 21 (52.5%)      | 19 (47.5%)  |                             | 5 (12.5%)         | 35 (92.1%)    |                             |
| > 57.0              | 36 (47.4%)       | 19 (52.8%)      | 17 (47.2%)  |                             | 8 (22.2%)         | 28 (73.7%)    |                             |
| Tumor size(cm)      | 76               |                 |             | 0.168                       |                   |               | 0.033                       |
| ≤ 4.0 <sup>c</sup>  | 38 (50.0%)       | 17 (44.7%)      | 21 (55.3%)  |                             | 3 (7.9%)          | 35 (92.1%)    |                             |
| > 4.0               | 38 (50.0%)       | 23 (60.5%)      | 15 (39.5%)  |                             | 10 (26.3%)        | 28 (73.7%)    |                             |
| Lauren type         | 76               |                 |             | 0.126                       |                   |               | 0.862                       |
| Intestinal          | 12 (15.8%)       | 5 (41.7%)       | 7 (58.3%)   |                             | 2 (16.7%)         | 10 (83.3%)    |                             |
| Diffuse             | 36 (47.4%)       | 16 (44.4%)      | 20 (55.6%)  |                             | 7 (19.4%)         | 29 (80.6%)    |                             |

|                   |            |            |            |            |            |       |
|-------------------|------------|------------|------------|------------|------------|-------|
| Mixed             | 28 (36.8%) | 19 (67.9%) | 9 (32.1%)  | 4 (14.3%)  | 24 (85.7%) |       |
| T stage           | 76         |            |            | < 0.001    |            | 0.085 |
| T1+T2             | 34 (44.7%) | 10 (29.4%) | 24 (70.6%) | 3 (8.8%)   | 31(91.2%)  |       |
| T3+T4             | 42 (55.3%) | 30 (71.4%) | 12 (28.6%) | 10 (23.8%) | 32(76.2%)  |       |
| N stage           | 76         |            |            | < 0.001    |            | 0.225 |
| N0                | 41 (53.9%) | 15 (36.6%) | 26 (63.4%) | 9 (22.0%)  | 32 (78.0%) |       |
| N+                | 35 (46.1%) | 25(71.4%)  | 10 (28.6%) | 4 (11.4%)  | 31 (88.6%) |       |
| M stage           | 76         |            |            | 1.000      |            | 0.647 |
| M0                | 75 (98.7%) | 39 (52.0%) | 36 (48.0%) | 13 (17.3%) | 62 (82.7%) |       |
| M1                | 1 (1.3%)   | 1 (100.0%) | 0 (0.0%)   | 0 (0.0%)   | 1(100.0%)  |       |
| pTNM              | 76         |            |            | < 0.001    |            | 0.353 |
| I-II              | 50 (65.8%) | 19 (38.0%) | 31 (62.0%) | 10 (20.0%) | 40 (80.0%) |       |
| III-IV            | 26 (34.2%) | 21 (80.8%) | 5 (19.2%)  | 3 (11.5%)  | 23 (88.5%) |       |
| Vascular invasion | 76         |            |            | 0.069      |            | 0.694 |
| Absent            | 49 (64.5%) | 22 (44.9%) | 27 (55.1%) | 9 (18.4%)  | 40 (81.6%) |       |
| Present           | 27 (35.5%) | 18 (66.7%) | 9 (33.3%)  | 4 (14.8%)  | 23 (85.2%) |       |
| Neural invasion   | 76         |            |            | 0.498      |            | 0.841 |



|                  |            |            |            |            |            |
|------------------|------------|------------|------------|------------|------------|
| Absent           | 37 (48.7%) | 18 (48.6%) | 19 (51.4%) | 6 (16.2%)  | 31 (83.8%) |
| Present          | 39 (51.3%) | 22 (56.4%) | 17 (43.6%) | 7 (17.9%)  | 32 (82.1%) |
| Differentiation  | 76         |            |            | 0.601      | 0.435      |
| Poorly           | 73 (96.1%) | 39 (53.4%) | 34 (46.6%) | 12 (16.4%) | 61 (83.8%) |
| Moderately       | 3 (4.1%)   | 1 (33.3%)  | 2 (66.7%)  | 1 (33.3%)  | 2 (66.7%)  |
| PD-L1 expression | 76         |            |            | 0.841      | 0.823      |
| CPS < 1          | 13 (17.1%) | 7 (53.8%)  | 6 (46.2%)  | 3 (23.1%)  | 10 (76.9%) |
| CPS ≥ 1          | 63 (82.9%) | 32 (50.8%) | 31 (49.2%) | 10 (15.9%) | 53 (84.1%) |

<sup>a</sup>Chi-square test; <sup>b</sup>Median age; <sup>c</sup>Median size. TLS, tertiary lymphoid structure;

EBV, Epstein-Barr virus; PD-L1, programmed death-ligand 1; CPS, the combined positive score.

**Table S2. Univariate and multivariate analyses of patients with EBV-positive gastric cancer of the SYSUCC cohort**

| <b>Characteristics<sup>a</sup></b>                                          | <b>P value</b> | <b>Hazard Ratio(95%CI)</b> |
|-----------------------------------------------------------------------------|----------------|----------------------------|
| <b>Univariate analysis</b>                                                  |                |                            |
| Gender (Female vs. Male)                                                    | 0.774          | 1.166 (0.409, 3.322)       |
| Age (>57.0 <sup>b</sup> vs. ≤ 57.0)                                         | 0.912          | 1.039 (0.525, 2.058)       |
| Tumor size(cm)(>4.75 <sup>c</sup> vs. ≤ 4.75)                               | < 0.001        | 5.046 (2.179, 11.687)      |
| Lauren type                                                                 |                |                            |
| Intestinal                                                                  |                |                            |
| Diffuse                                                                     | 0.061          | 2.757 (0.956, 7.949)       |
| Mixed                                                                       | 0.300          | 1.636 (0.645, 4.151)       |
| T stage (T3+T4 vs. T1+T2)                                                   | 0.007          | 15.456 (2.103, 113.604)    |
| N stage (N+ vs. N0)                                                         | 0.029          | 36.974 (1.435, 952.626)    |
| M stage (M1 vs. M0)                                                         | <0.001         | 7.923 (3.810, 16.475)      |
| pTNM (III-IV vs. I-II)                                                      | 0.002          | 23.511 (3.208, 172.303)    |
| Vascular invasion (Present vs. absent)                                      | <0.001         | 6.885 (2.394, 19.801)      |
| Neural invasion (Present vs. absent)                                        | 0.005          | 7.862 (1.869, 33.071)      |
| Differentiation (Moderately vs. poorly)                                     | 0.26           | 0.665 (0.327, 1.352)       |
| PD-L1 expression<br>(CPS ≥ 1 vs. CPS < 1)                                   | < 0.001        | 0.155 (0.064, 0.377)       |
| EBV-DNA (Positive vs. negative)                                             | 0.461          | 0.456 (0.057, 3.673)       |
| Intratumoral TLS<br>(TLS FL-II <sup>+</sup> vs. TLS FL-II <sup>-</sup> )    | < 0.001        | 0.086 (0.036, 0.202)       |
| Peritumoral TLS<br>(TLSTM FL-II <sup>+</sup> vs. TLSTM FL-II <sup>-</sup> ) | < 0.001        | 0.166 (0.074, 0.374)       |
| <b>Multivariate analysis</b>                                                |                |                            |
| Intratumoral TLS (TLS FL-II <sup>+</sup> vs. TLS FL-II <sup>-</sup> )       | < 0.001        | 0.155 (0.063, 0.379)       |
| PD-L1 expression<br>(CPS ≥ 1 vs. CPS < 1)                                   | 0.001          | 0.194 (0.074, 0.512)       |
| pTNM (III-IV vs. I-II)                                                      | 0.039          | 8.491 (1.113, 64.8)        |

<sup>a</sup>The analyses were performed with the use of Cox proportional-hazards regression;

<sup>b</sup>Median age; <sup>c</sup>Median size. EBV, Epstein-Barr virus; PD-L1, programmed death-ligand 1; CPS, the combined positive score; TLS, tertiary lymphoid structures.

**Table S3 The mutation distribution of the top 50 most frequently mutated genes from the SYSUCC and TCGA cohorts.**

| Gene    | SYSUCC cohort           |                             |                         |                             |                | <i>P</i> value | Gene | TCGA cohort             |                             |                         |                             |                |
|---------|-------------------------|-----------------------------|-------------------------|-----------------------------|----------------|----------------|------|-------------------------|-----------------------------|-------------------------|-----------------------------|----------------|
|         | Non-mature TLSs (n=10)  |                             | Mature TLSs (n=29)      |                             | <i>P</i> value |                |      | Non-mature TLSs (n=17)  |                             | Mature TLSs (n=8)       |                             | <i>P</i> value |
|         | Number with alterations | Percentage with alterations | Number with alterations | Percentage with alterations |                |                |      | Number with alterations | Percentage with alterations | Number with alterations | Percentage with alterations |                |
| PIK3CA  | 6                       | 60%                         | 16                      | 55%                         | 1              | PIK3CA         | 12   | 71%                     | 7                           | 88%                     | 0.624                       |                |
| ARID1A  | 5                       | 50%                         | 17                      | 57%                         | 0.721          | ARID1A         | 7    | 41%                     | 5                           | 63%                     | 0.411                       |                |
| SMAD4   | 5                       | 50%                         | 5                       | 17%                         | 0.087          | TTN            | 8    | 47%                     | 3                           | 38%                     | 1                           |                |
| LRP1B   | 4                       | 40%                         | 4                       | 14%                         | 0.167          | MUC16          | 5    | 29%                     | 2                           | 25%                     | 1                           |                |
| PIK3R1  | 0                       | 0                           | 6                       | 21%                         | 0.308          | AHNAK2         | 4    | 24%                     | 2                           | 25%                     | 1                           |                |
| TP53    | 1                       | 10%                         | 5                       | 17%                         | 1              | BCOR           | 2    | 12%                     | 3                           | 38%                     | 0.283                       |                |
| BCOR    | 1                       | 10%                         | 3                       | 10%                         | 1              | FAT4           | 4    | 24%                     | 1                           | 13%                     | 1                           |                |
| EGFR    | 1                       | 10%                         | 3                       | 10%                         | 1              | KMT2D          | 4    | 24%                     | 1                           | 13%                     | 1                           |                |
| KMT2D   | 1                       | 10%                         | 3                       | 10%                         | 1              | NBEA           | 5    | 29%                     | 0                           | 0                       | 0.14                        |                |
| SMARCA4 | 3                       | 30%                         | 1                       | 3%                          | 0.045          | PCDH10         | 4    | 24%                     | 1                           | 13%                     | 1                           |                |
| BRCA2   | 1                       | 10%                         | 2                       | 7%                          | 1              | TCHH           | 2    | 12%                     | 3                           | 38%                     | 0.283                       |                |
| GNAS    | 0                       | 0                           | 3                       | 10%                         | 0.556          | CDH9           | 4    | 24%                     | 0                           | 0                       | 0.269                       |                |
| MAP2K1  | 1                       | 10%                         | 2                       | 7%                          | 1              | CSMD1          | 3    | 18%                     | 1                           | 13%                     | 1                           |                |
| PTEN    | 0                       | 0                           | 3                       | 10%                         | 0.556          | CSRNP3         | 3    | 18%                     | 1                           | 13%                     | 1                           |                |
| APC     | 0                       | 0                           | 2                       | 7%                          | 1              | DNAH5          | 3    | 18%                     | 1                           | 13%                     | 1                           |                |
| ATM     | 0                       | 0                           | 2                       | 7%                          | 1              | DNAH8          | 3    | 18%                     | 1                           | 13%                     | 1                           |                |
| BLM     | 1                       | 10%                         | 1                       | 3%                          | 0.452          | GRIK1          | 3    | 18%                     | 1                           | 13%                     | 1                           |                |
| BRAF    | 0                       | 0                           | 2                       | 7%                          | 1              | IGSF10         | 3    | 18%                     | 1                           | 13%                     | 1                           |                |
| CASP8   | 1                       | 10%                         | 1                       | 3%                          | 0.452          | LRP1B          | 4    | 24%                     | 0                           | 0                       | 0.269                       |                |
| FANCM   | 1                       | 10%                         | 1                       | 3%                          | 0.452          | MUC17          | 4    | 24%                     | 0                           | 0                       | 0.269                       |                |

|         |   |     |   |    |       |         |   |     |   |     |       |
|---------|---|-----|---|----|-------|---------|---|-----|---|-----|-------|
| FBXW7   | 0 | 0   | 2 | 7% | 1     | MYH2    | 2 | 12% | 2 | 25% | 0.57  |
| FLT3    | 1 | 10% | 1 | 3% | 0.452 | NEK10   | 3 | 18% | 1 | 13% | 1     |
| GRIN2A  | 1 | 10% | 1 | 3% | 0.452 | PRDM9   | 3 | 18% | 1 | 13% | 1     |
| KRAS    | 0 | 0   | 2 | 7% | 1     | PTEN    | 3 | 18% | 1 | 13% | 1     |
| MSH2    | 1 | 10% | 1 | 3% | 0.452 | ABCA10  | 2 | 12% | 1 | 13% | 1     |
| MSH6    | 0 | 0   | 2 | 7% | 1     | ABCA13  | 3 | 18% | 0 | 0   | 0.527 |
| NF1     | 0 | 0   | 2 | 7% | 1     | AHNAK   | 3 | 18% | 0 | 0   | 0.527 |
| PBRM1   | 0 | 0   | 2 | 7% | 1     | APOB    | 3 | 18% | 0 | 0   | 0.527 |
| RUNX1T1 | 0 | 0   | 2 | 7% | 1     | ARFGEF2 | 2 | 12% | 1 | 13% | 1     |
| TGFBR2  | 1 | 10% | 1 | 3% | 0.452 | BIRC6   | 3 | 18% | 0 | 0   | 0.527 |
| ABL1    | 0 | 0   | 1 | 3% | 1     | CIT     | 1 | 6%  | 2 | 25% | 0.231 |
| AKT1    | 0 | 0   | 1 | 3% | 1     | CMYA5   | 3 | 18% | 0 | 0   | 0.527 |
| AKT3    | 0 | 0   | 1 | 3% | 1     | CNTN6   | 3 | 18% | 0 | 0   | 0.527 |
| AMER1   | 0 | 0   | 1 | 3% | 1     | COL4A4  | 3 | 18% | 0 | 0   | 0.527 |
| ASXL1   | 0 | 0   | 1 | 3% | 1     | COL6A3  | 3 | 18% | 0 | 0   | 0.527 |
| ATR     | 0 | 0   | 1 | 3% | 1     | CTNNB1  | 3 | 18% | 0 | 0   | 0.527 |
| ATRX    | 1 | 10% | 0 | 0  | 0.256 | CYP4F2  | 3 | 18% | 0 | 0   | 0.527 |
| BARD1   | 0 | 0   | 1 | 3% | 1     | DCHS2   | 3 | 18% | 0 | 0   | 0.527 |
| BCL2    | 0 | 0   | 1 | 3% | 1     | DMD     | 3 | 18% | 0 | 0   | 0.527 |
| CBL     | 1 | 10% | 0 | 0  | 0.256 | DNAH9   | 3 | 18% | 0 | 0   | 0.527 |
| CDH1    | 0 | 0   | 1 | 3% | 1     | ERBB3   | 2 | 12% | 1 | 13% | 1     |
| CDK12   | 0 | 0   | 1 | 3% | 1     | FBN2    | 2 | 12% | 1 | 13% | 1     |
| CDKN2B  | 0 | 0   | 1 | 3% | 1     | MBD1    | 2 | 12% | 1 | 13% | 1     |
| CIC     | 0 | 0   | 1 | 3% | 1     | NEB     | 3 | 18% | 0 | 0   | 0.527 |
| CREBBP  | 0 | 0   | 1 | 3% | 1     | NLRP9   | 3 | 18% | 0 | 0   | 0.527 |
| CRLF2   | 0 | 0   | 1 | 3% | 1     | PTPRD   | 2 | 12% | 1 | 13% | 1     |
| DAXX    | 0 | 0   | 1 | 3% | 1     | SCN11A  | 2 | 12% | 1 | 13% | 1     |
| EP300   | 0 | 0   | 1 | 3% | 1     | USH2A   | 3 | 18% | 0 | 0   | 0.527 |
| EPHA3   | 0 | 0   | 1 | 3% | 1     | VWF     | 2 | 12% | 1 | 13% | 1     |
| ERBB3   | 0 | 0   | 1 | 3% | 1     | ZFHX4   | 2 | 12% | 1 | 13% | 1     |

**Table S4 Comparison of the top 10 genes in EBVaGC in SYSUCC and TCGA cohorts.**

| Gene    | EBVaGC in SYSUCC |            | EBVaGC in TCGA |            |
|---------|------------------|------------|----------------|------------|
|         | Number of case   | Percentage | Number of case | Percentage |
| PIK3CA  | 22               | 56.41%     | 19             | 76.00%     |
| ARID1A  | 22               | 56.41%     | 12             | 48.00%     |
| SMAD4   | 10               | 25.64%     | 3              | 12.00%     |
| LRP1B   | 8                | 20.51%     | 4              | 16.00%     |
| PIK3R1  | 6                | 15.38%     | 0              | 0          |
| TP53    | 6                | 15.38%     | 0              | 0          |
| BCOR    | 4                | 10.26%     | 5              | 20.00%     |
| EGFR    | 4                | 10.26%     | 0              | 0          |
| KMT2D   | 4                | 10.26%     | 5              | 20.00%     |
| SMARCA4 | 4                | 10.26%     | 0              | 0          |
